# Supplementary material for: Metagenomic next-generation sequencing Reveals Respiratory flora distribution in COVID-19
Source: Research Square preprint supplement (doi:10.21203/rs.3.rs-7116247/v1), 2025-08-19
Supplement: Supplementary file 1 [file dfb197df32d4e5eac6ad50ae.docx]

| **1. Demographic and clinical characteristics of patients in different groups** | | | | |
| --- | --- | --- | --- | --- |
| **Characteristics** | **Overall**  **(n=43)** | **COVID-19**  **(n=34)** | **Non-COVID-19**  **(n=9)** | ***P*-value** |
| **Demographics** |  |  |  |  |
| Gender (n, %) |  |  |  |  |
| Female | 12 (27.9) | 9 (26.5) | 3 (33.3) | 1.000 |
| Male | 31 (72.1) | 25 (73.5) | 6 (66.7) |  |
| Age (mean (SD)) | 74.63 (13.33) | 74.44 (13.93) | 75.33 (11.45) | 0.861 |
| **Laboratory examination** |  |  |  |  |
| CRP (median [IQR]) | 11.90 [2.69, 36.35] | 10.37 [2.60, 30.68] | 21.45 [3.00, 157.00] | 0.204 |
| PCT (median [IQR]) | 0.12 [0.06, 0.43] | 0.11 [0.06, 0.32] | 0.30 [0.05, 1.14] | 0.289 |
| NT-proBNP(median [IQR]) | 819.00 [272.50, 1588.00] | 829.00 [254.25, 2608.75] | 726.00 [355.00, 1585.00] | 0.765 |
| Neu (mean (SD)) | 8.10 (4.41) | 8.11 (3.83) | 8.07 (6.47) | 0.979 |
| Lym (median [IQR]) ** | 0.79 [0.54, 1.35] | 0.67 [0.49, 0.99] | 1.51 [1.41, 2.04] | 0.004 |
| Neu % (median [IQR]) ** | 81.20 [75.40, 90.55] | 83.80 [76.60, 91.42] | 75.00 [56.60, 81.00] | 0.009 |
| Lym % (median [IQR]) * | 11.90 [4.75, 16.05] | 9.50 [3.85, 14.42] | 16.30 [13.00, 26.80] | 0.013 |
| LDH (median [IQR]) ** | 254.00 [222.00, 427.50] | 289.50 [233.00, 445.25] | 213.00 [181.00, 242.00] | 0.004 |
| NLR (median [IQR]) * | 7.38 [4.86, 19.13] | 9.28 [5.57, 22.49] | 4.75 [2.11, 6.25] | 0.011 |
| IL.6 (median [IQR]) | 23.58 [7.37, 59.75] | 23.58 [6.98, 55.42] | 214.70 [214.70, 214.70] | 0.113 |
| SF (median [IQR]) | 618.50 [437.75, 1093.00] | 618.50 [437.75, 1093.00] | NA | NA |
| **Hospital_stay (median [IQR])** | 14.00 [11.00, 22.50] | 14.50 [11.00, 21.75] | 12.00 [9.00, 27.00] | 0.976 |
| **Outcome (n, %)** |  |  |  | 1.000 |
| COPD | 36 | 29 | 7 |  |
| coronary heart disease | 27 | 22 | 5 |  |
| Death | 7 (16.3) | 6 (17.6) | 1 (11.1) |  |
| Survival | 36 (83.7) | 28 (82.4) | 8 (88.9) |  |

| **2. Demographic and clinical characteristics of patients in different groups** | | | | | |
| --- | --- | --- | --- | --- | --- |
| Characteristics | Overall  (n=43) | Critical  (n=14) | Non-critical  (n=20) | Non-COVID-19  (n=9) | *P*-value |
| Demographics |  |  |  |  |  |
| Gender (n, %) |  |  |  |  | 0.792 |
| Female | 12 (27.9) | 3 (21.4) | 6 (30.0) | 3 (33.3) |  |
| Male | 31 (72.1) | 11 (78.6) | 14 (70.0) | 6 (66.7) |  |
| Age (mean (SD)) | 74.63 (13.33) | 76.00 (13.59) | 73.35 (14.41) | 75.33 (11.45) | 0.843 |
| Laboratory examination |  |  |  |  |  |
| CRP (median [IQR]) | 11.90 [2.69, 36.35] | 19.20 [4.55, 63.67] | 7.62 [2.25, 20.45] | 21.45 [3.00, 157.00] | 0.212 |
| PCT (median [IQR]) * | 0.12 [0.06, 0.43] | 0.22 [0.10, 0.59] | 0.07 [0.05, 0.13] | 0.30 [0.05, 1.14] | 0.041 |
| NT-proBNP (median [IQR]) | 819.00 [272.50, 1588.00] | 1225.00 [856.10, 9097.00] | 554.00 [217.00, 1066.75] | 726.00 [355.00, 1585.00] | 0.052 |
| Neu (mean (SD)) ** | 6.60 [4.90, 10.97] | 10.90 [9.03, 11.36] | 5.61 [4.15, 7.03] | 5.16 [3.19, 11.00] | 0.003 |
| Lym (median [IQR]) *** | 0.79 [0.54, 1.35] | 0.46 [0.34, 0.56] | 0.96 [0.79, 1.28] | 1.51 [1.41, 2.04] | <0.001 |
| Neu % (median [IQR]) *** | 81.20 [75.40, 90.55] | 92.24 [91.12, 94.07] | 77.45 [75.07, 81.62] | 75.00 [56.60, 81.00] | <0.001 |
| Lym % (median [IQR]) *** | 11.90 [4.75, 16.05] | 3.40 [2.85, 4.68] | 13.55 [11.50, 17.33] | 16.30 [13.00, 26.80] | <0.001 |
| LDH (median [IQR]) *** | 254.00 [222.00, 427.50] | 559.50 [430.25, 710.75] | 237.00 [216.75, 262.50] | 213.00 [181.00, 242.00] | <0.001 |
| NLR (median [IQR]) *** | 7.38 [4.86, 19.13] | 24.82 [20.11, 30.62] | 6.07 [4.48, 7.46] | 4.75 [2.11, 6.25] | <0.001 |
| IL-6 (median [IQR]) | 23.58 [7.37, 59.75] | 21.19 [10.50, 56.77] | 25.80 [5.91, 50.45] | 214.70 [214.70, 214.70] | 0.209 |
| SF (median [IQR]) | 618.50 [437.75, 1093.00] | 618.00 [463.25, 901.75] | 655.00 [406.25, 1229.25] | NA | 0.806 |
| Hospital_stay (median [IQR]) * | 14.00 [11.00, 22.50] | 21.50 [15.50, 33.00] | 12.50 [9.00, 15.25] | 12.00 [9.00, 27.00] | 0.015 |
| Outcome (n, %) ** |  |  |  |  | 0.003 |
| COPD | 36 | 13 | 16 | 7 |  |
| coronary heart disease | 27 | 9 | 13 | 5 |  |
| Death | 7 (16.3) | 6 (42.9) | 0 (0.0) | 1 (11.1) |  |
| Survival | 36 (83.7) | 8 (57.1) | 20 (100.0) | 8 (88.9) |  |
